# Supplementary material
Source: PubMed Central journal article supplement (PMC4498196)
Supplement: supp_tpc.114.132795_tpc132795_SupplementalData.pdf [file supp_tpc.114.132795_tpc132795_SupplementalData.pdf]

## Supplemental Data

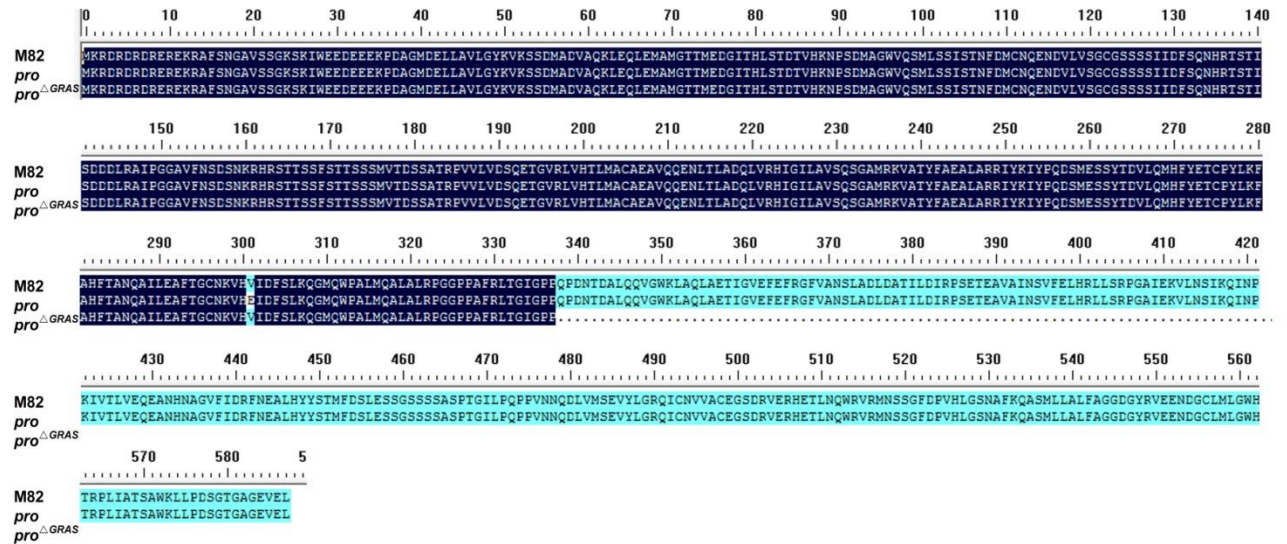

**Supplemental Figure 1.** Predicated amino acid sequence of PRO from M82, *pro* and *pro*<sup>ΔGRAS</sup>. Dark blue indicates predicted amino acid sequence present in M82, *pro* and *pro*<sup>ΔGRAS</sup>. Light blue indicates amino acid sequence present in some but not all genetic backgrounds. The entire C' terminal region of PRO is missing from *pro*<sup>ΔGRAS</sup>.

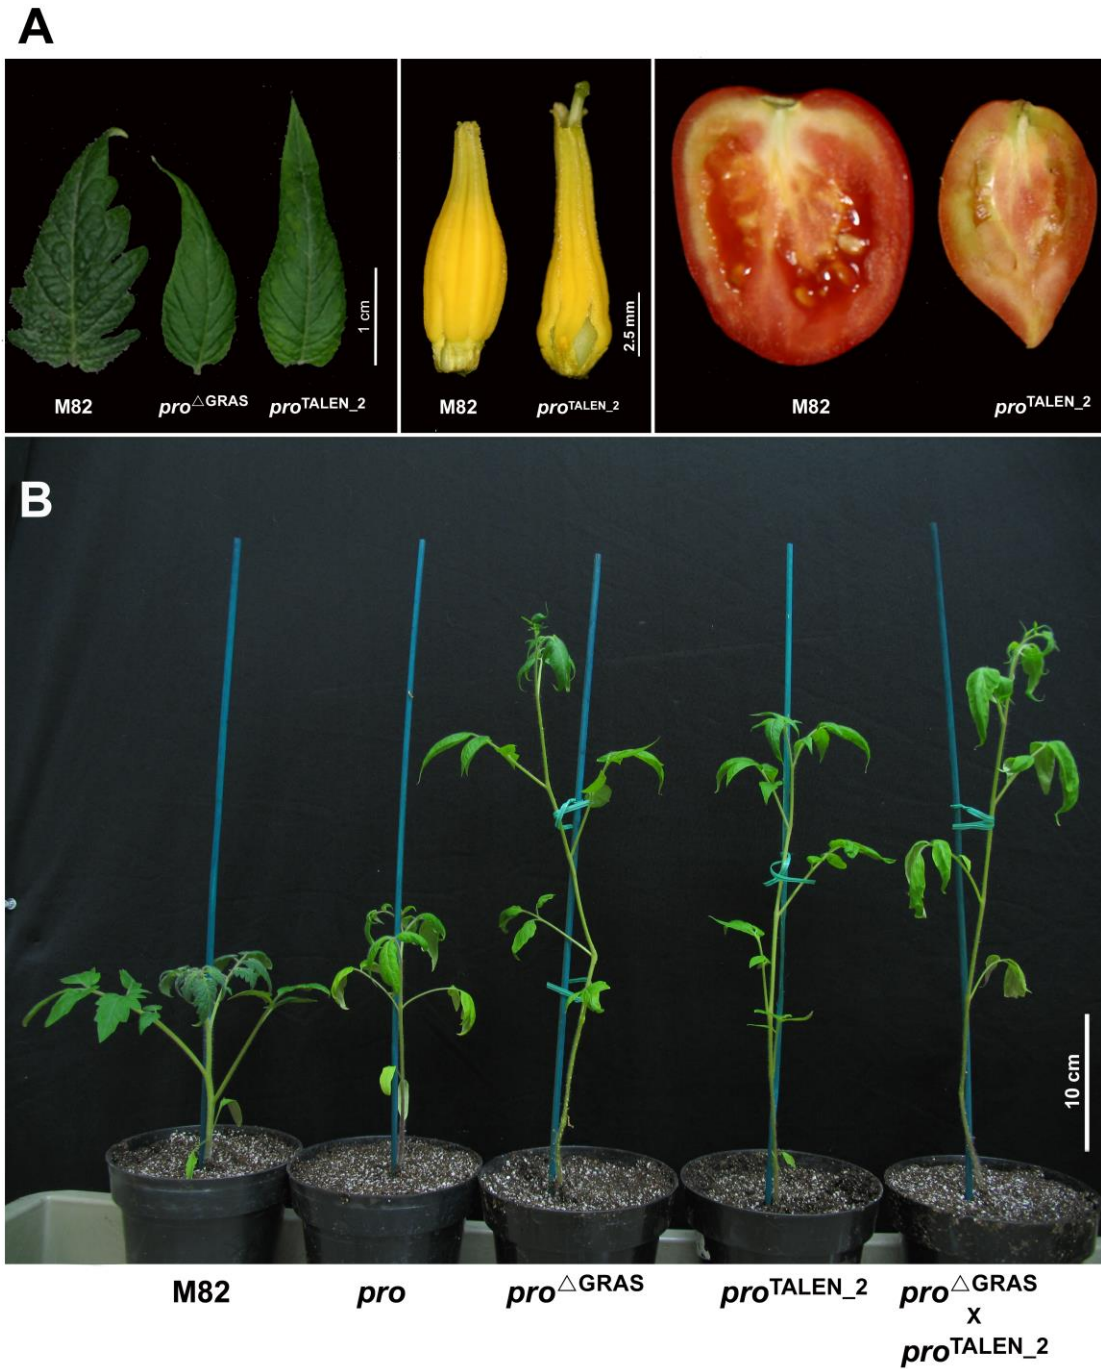

**Supplemental Figure 2.** Phenotypic characterization of *pro*<sup>TALEN\_2</sup> plants. A. Leaves, flowers and fruits of M82 and *pro*<sup>TALEN\_2</sup>. B. Four week old M82, *pro*, *pro*<sup>ΔGRAS</sup>, *pro*<sup>TALEN\_2</sup> and *pro*<sup>TALEN\_2</sup>/*pro*<sup>ΔGRAS</sup> plants.

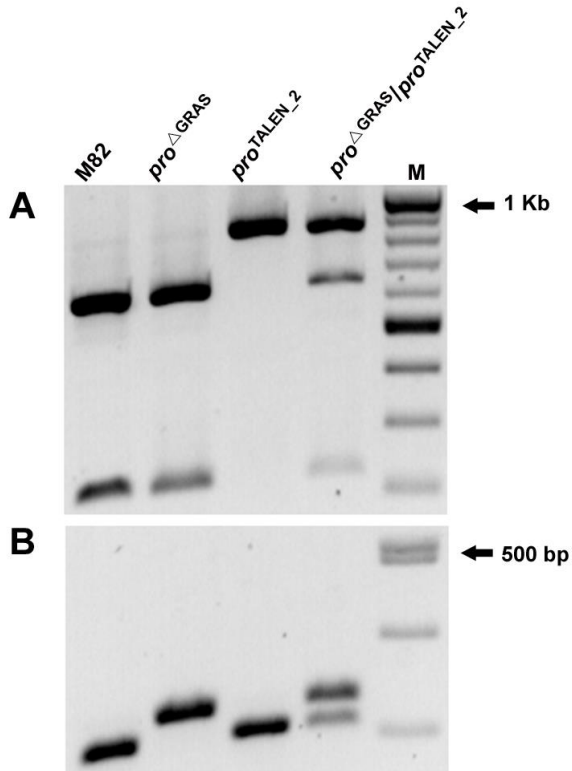

**Supplemental Figure 3.** Genotyping of plants shown in Supplemental Figure 2B. A) Genotyping for the *pro<sup>TALEN\_2</sup>* allele. The regions of the TALEN-induced mutation was PCR amplified and digested with *Sm1*. *Sm1* cleaves M82 (WT) amplicons producing 647bp and 225bp products. The *pro<sup>TALEN\_2</sup>* allele is resistant to *Sm1* digestion. (M) indicates the marker lane. B) Genotyping for the *pro<sup>ΔGRAS</sup>* allele. PCR amplification was performed using *pro<sup>ΔGRAS</sup>* Derived Cleaved Amplified Polymorphic Sequences (dCAPs) primers and the amplicons were digested with *PvuII*. *PvuII* digests wild-type amplicons producing 302bp and 27bp products, while *pro<sup>ΔGRAS</sup>* are resistant to digestion.

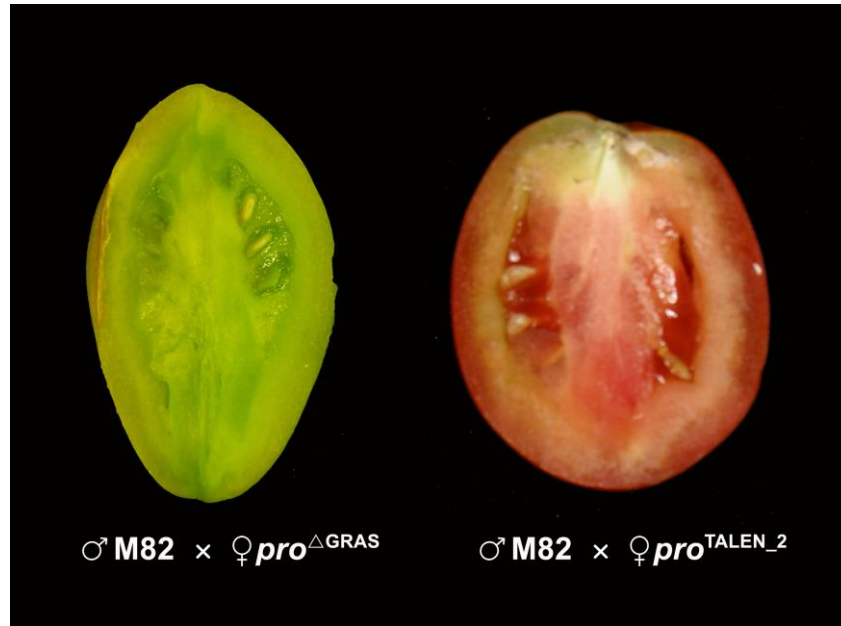

**Supplemental Figure 4.** Seed set in tomato fruits following hand pollination of *pro*<sup>ΔGRAS</sup> and *pro*<sup>TALEN\_2</sup> emasculated flowers with M82 pollen grains.

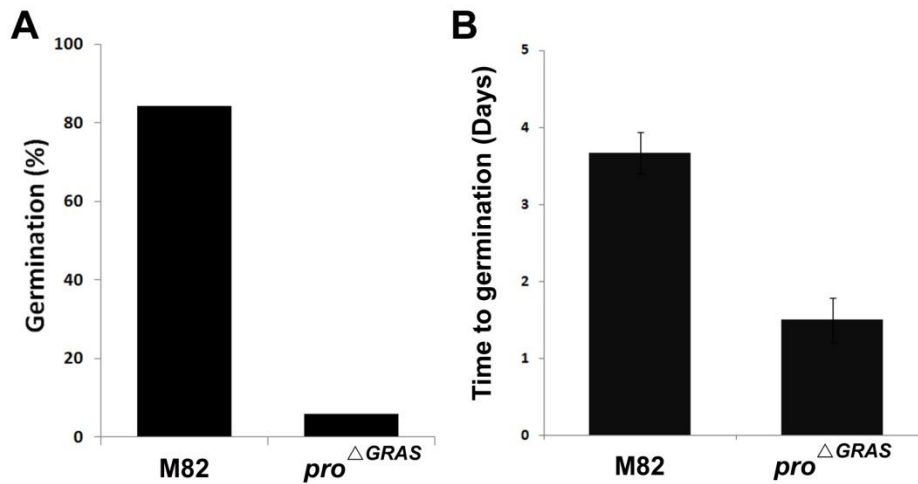

**Supplemental Figure 5.** *pro*<sup>ΔGRAS</sup> seeds are sensitive to desiccation and have weak dormancy. **(A)** Germination of M82 and *pro*<sup>ΔGRAS</sup> seeds stored dry for one month. Seeds were sown on soil and the number of seedlings with M82 or *pro*<sup>ΔGRAS</sup> phenotypes was counted. **(B)** Germination time of M82 and *pro*<sup>ΔGRAS</sup> fresh seeds. Seeds from heterozygous fruits were harvested and sown immediately on soil. Time to germination (days) was measured. Values are average of 15 seedlings ± SE.

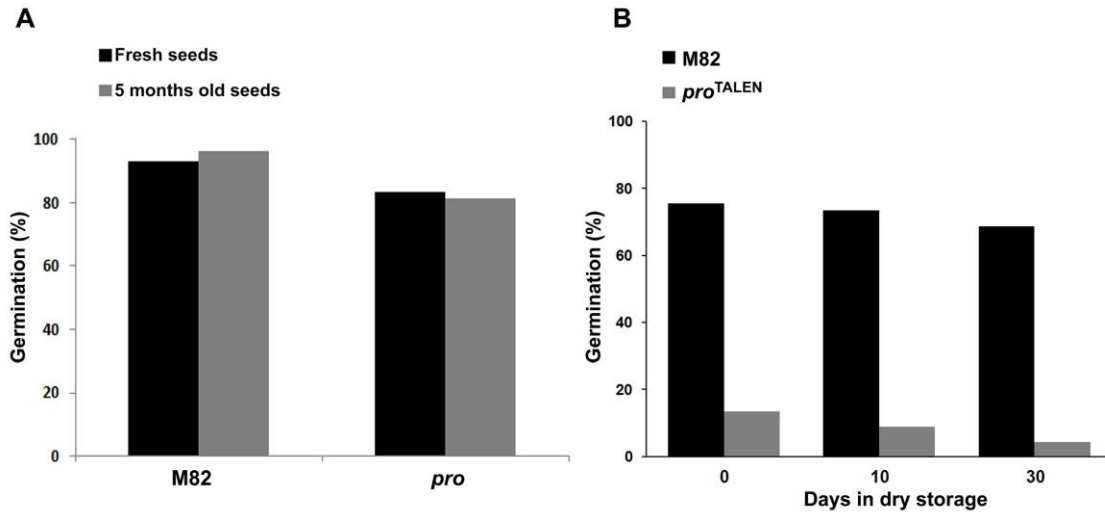

**Supplemental Figure 6.** *pro*<sup>TALEN<sub>2</sub></sup> but not *pro* seeds are sensitive to desiccation. (A) M82 and *pro* seeds were sown fresh (black columns) or stored at room temperature for 5 months and then sown (grey columns). (B) M82 and *pro*<sup>TALEN</sup> seeds were sown on soil after different periods of dry storage.

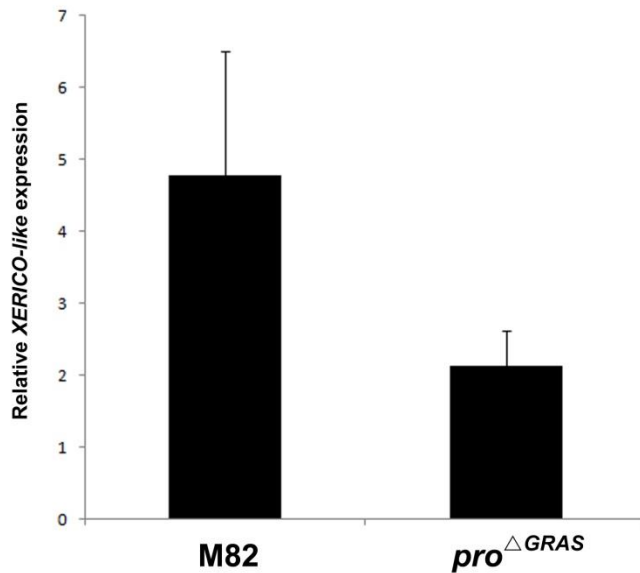

**Supplemental Figure 7.** Expression analyses (qRT-PCR) of the putative *XERICO* gene in tomato. RNA was extracted from fresh M82 and *pro*<sup>ΔGRAS</sup> homozygous seeds. Values are the average of three biological replicas ± standard error (SE).

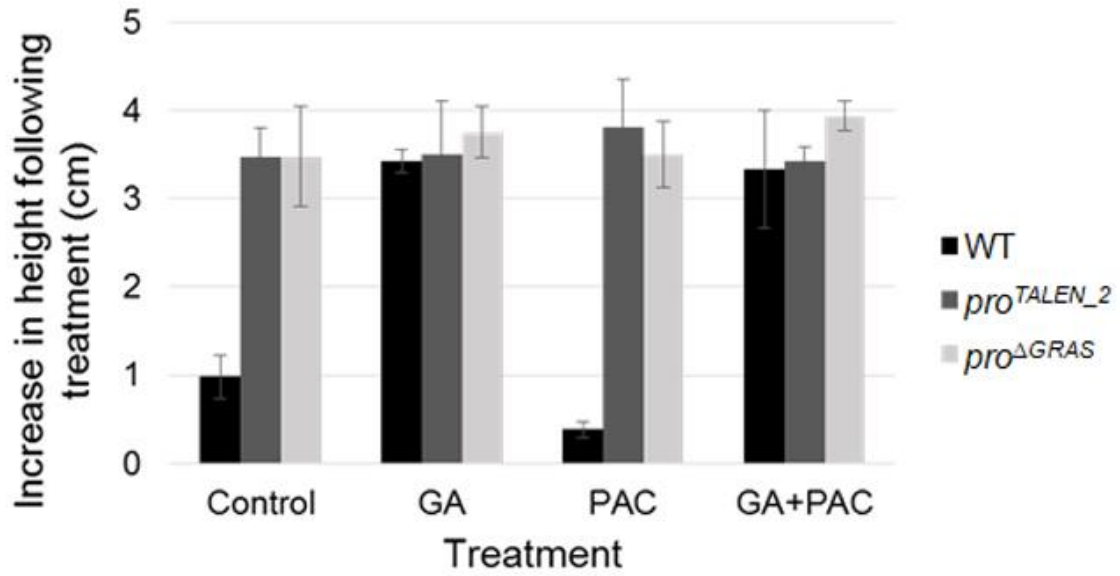

**Supplemental Figure 8.** Average increase in plant height of M82 (WT), *pro<sup>TALEN\_2</sup>* and *pro<sup>ΔGRAS</sup>* seedlings following five days of daily treatments with GA<sub>3</sub> (50μM), PAC (100mg/L) or GA+PAC solutions. Values are average of five to eight plants ± SE.

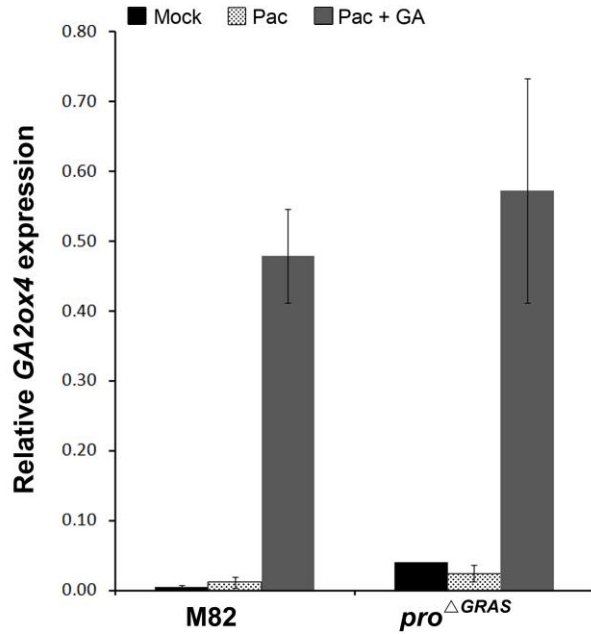

**Supplemental Figure 9.** Regulation of *GA2ox4* expression by GA in *pro $\Delta$ GRAS*. qRT-PCR analysis of *GA2ox4* expression. Seedlings were treated with 10mg/l PAC for three days, followed by one application of GA<sub>3</sub> (100 $\mu$ M). RNA was extracted from young leaves 3 hours after the application of GA and analyzed. Values (gene-to-*TUBULIN* ratios) are means of three biological replicates  $\pm$  SE.

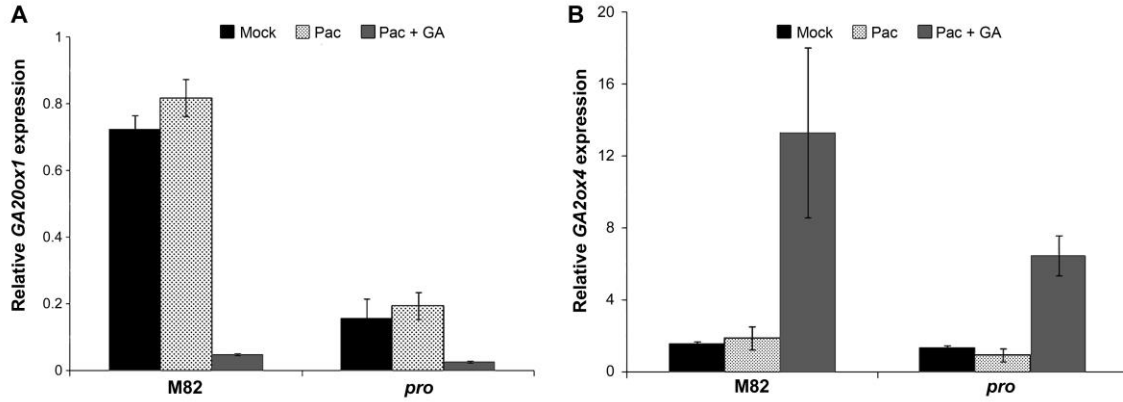

**Supplemental Figure 10.** Expression analyses of *GA20ox1* and *GA2ox4* in M82 and *pro*. **(A)** qRT-PCR analysis of *GA20ox1* expression and **(B)** qRT-PCR analysis of *GA2ox4* expression. Seedlings were treated with PAC followed by  $GA_3$  application. RNA was extracted from young leaves and analyzed. Values (gene-to-*TUBULIN* ratios) are means of three biological replicates  $\pm$  standard error (SE).

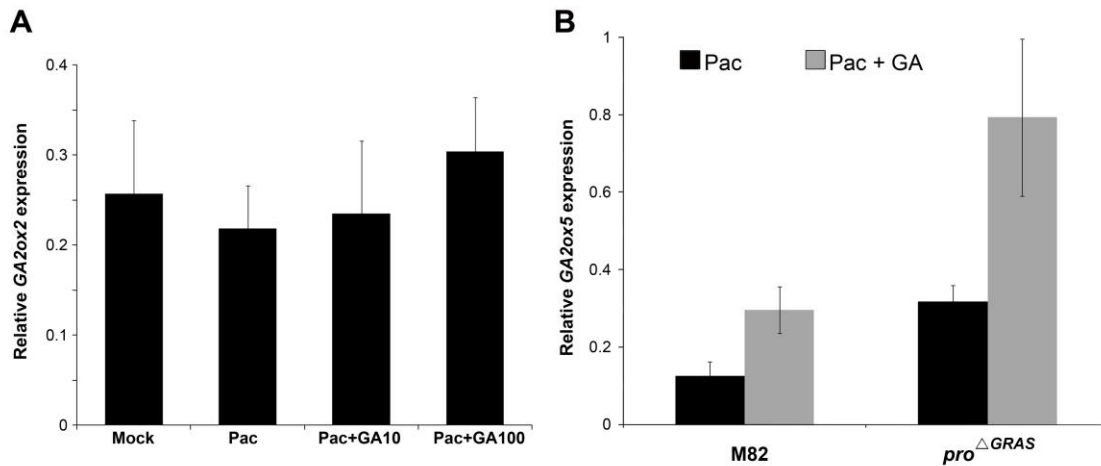

**Supplemental Figure 11.** Expression analyses (qRT-PCR) of *GA2ox2* and *GA2ox5*. **(A)** M82 seedlings were treated with PAC followed by 10 $\mu$ M or 100 $\mu$ M  $GA_3$  application. RNA was extracted from young leaves 3 hours after the application of the hormone and analyzed for *GA2ox2* expression. Values (gene-to-*TUBULIN* ratios) are means of three biological replicates  $\pm$  standard error (SE). **(B)** M82 and *pro* $\Delta$ *GRAS* seedlings were treated with PAC followed by application of 10 $\mu$ M  $GA_3$ . RNA was extracted from young leaves 3 hours after the application of the hormone and analyzed. Values (gene-to-*TUBULIN* ratios) are means of three biological replicates  $\pm$  standard error (SE).



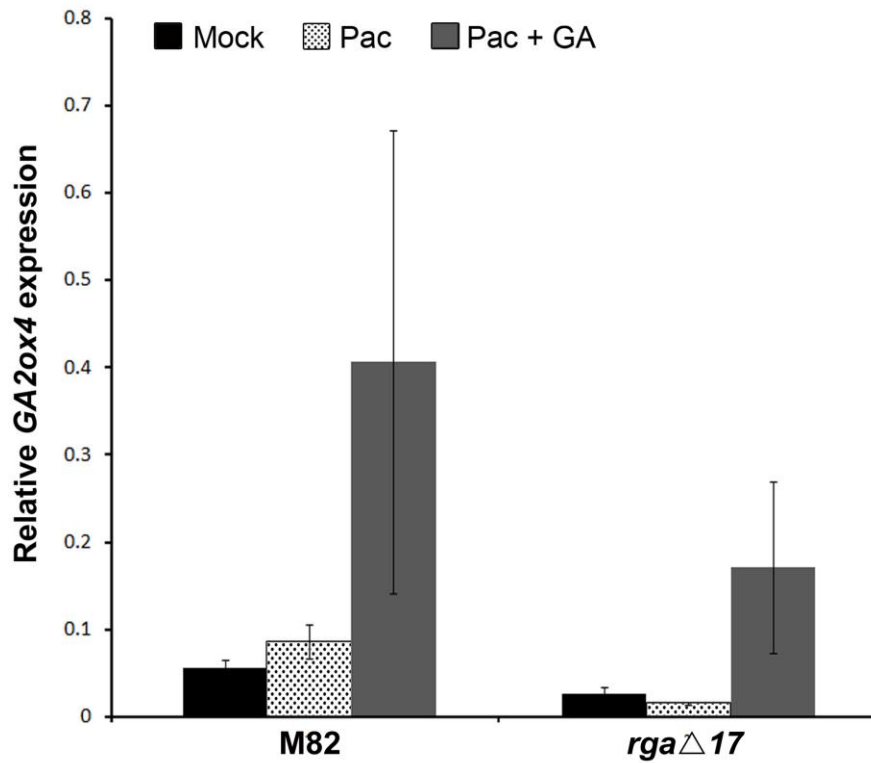

**Supplemental Figure 12.** qRT-PCR analyses of *GA2ox4* expression in M82 and *rga*Δ17 leaves treated with 10mg/l PAC for three days or PAC for three days followed by one application of 100μM GA<sub>3</sub>. Values (gene-to-*TUBULIN* ratios) are means of three biological replicates ± SE.

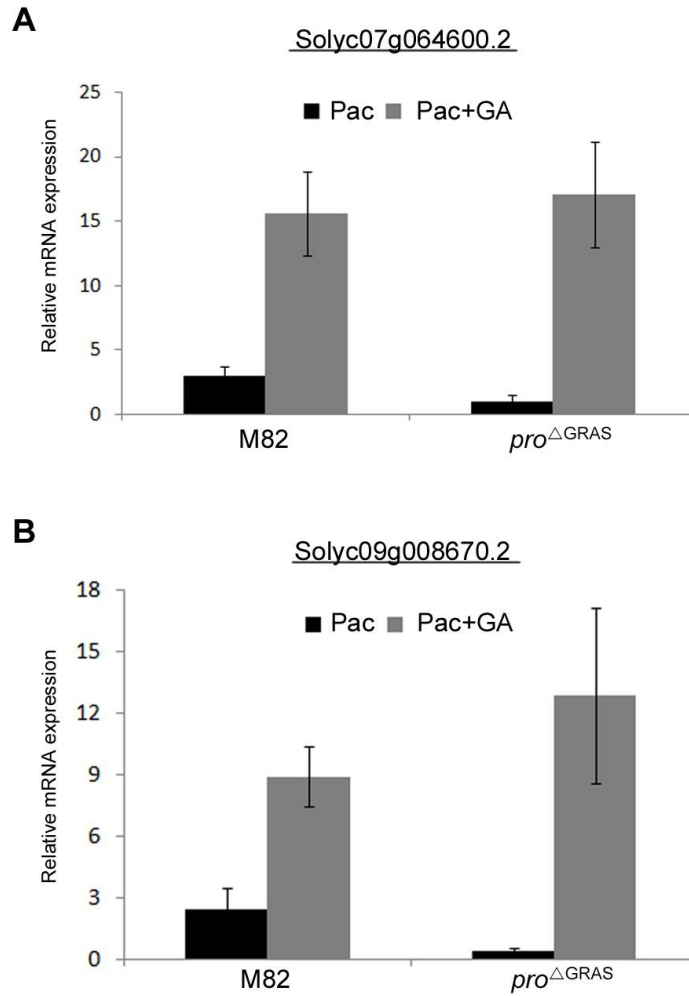

**Supplemental Figure 13.** qRT-PCR analyses of Endoribonuclease and Threonine ammonia lyase. M82 and *pro*<sup>ΔGRAS</sup> seedlings were treated with 10mg/l PAC for three days and then part of them with 10μM GA<sub>3</sub>. RNA was extracted from young leaves 3 hours after the GA treatment and analyzed for (A) Endoribonuclease (Solyc07g064600.2) and (B) Threonine ammonia lyase (Solyc09g008670.2) expression. Values (gene-to-*TUBULIN* ratios) are means of three or four biological replicates ± SE.

**Supplemental Table 1.** *pro<sup>TALEN\_2</sup>* plants are male, but not female sterile.

| <b>M82 x <i>pro<sup>TALEN</sup></i><br/>crossses<sup>a</sup></b> | <b>M82 (♂) x<br/>M82 (♀)</b> | <b>M82 (♂) x<br/><i>pro<sup>TALEN</sup></i> (♀)</b> | <b><i>pro<sup>TALEN</sup></i> (♂) x<br/>M82 (♀)</b> | <b><i>pro<sup>TALEN</sup></i> (♂) x<br/><i>pro<sup>TALEN</sup></i> (♀)</b> |
|------------------------------------------------------------------|------------------------------|-----------------------------------------------------|-----------------------------------------------------|----------------------------------------------------------------------------|
| <b>Flowers corssed</b>                                           | <b>10</b>                    | <b>10</b>                                           | <b>10</b>                                           | <b>10</b>                                                                  |
| <b>Fruits developed</b>                                          | <b>10</b>                    | <b>9</b>                                            | <b>0</b>                                            | <b>8*</b>                                                                  |
| <b>%</b>                                                         | <b>100</b>                   | <b>90</b>                                           | <b>0</b>                                            | <b>80</b>                                                                  |

<sup>a</sup>All flowers were emasculated and then crossed with the respective pollen. Flowers from the *pro<sup>TALEN\_2</sup>* (♂) x M82 (♀) senesced one week after the cross, therefore, no fruits were developed.

\*parthenocarpic fruits

---

**Supplemental Table 2. Complete list of GA up-regulated genes**

| GA up-regulated genes |                                             |                       |                           |                          |                          |                             |                           |                          |                          |
|-----------------------|---------------------------------------------|-----------------------|---------------------------|--------------------------|--------------------------|-----------------------------|---------------------------|--------------------------|--------------------------|
| SolyC                 | Description                                 | M82                   |                           |                          |                          | <i>pro</i> <sup>ΔGRAS</sup> |                           |                          |                          |
|                       |                                             | Mean Pac <sup>a</sup> | Mean Pac +GA <sup>a</sup> | Fold change <sup>b</sup> | Adj P Value <sup>c</sup> | Mean Pac <sup>a</sup>       | Mean Pac +GA <sup>a</sup> | Fold change <sup>b</sup> | Adj P Value <sup>c</sup> |
| Solyc05g007950.2      | Ribonuclease T2                             | 68                    | 1068                      | 15.78                    | 5.62E-08                 | 189                         | 763                       | 4.05                     | 0.115224                 |
| Solyc12g010800.1      | BZIP transcription factor                   | 10                    | 106                       | 10.29                    | 7.15E-06                 | 41                          | 87                        | 2.15                     | 0.999968                 |
| Solyc03g025380.2      | Peroxidase                                  | 24                    | 243                       | 9.98                     | 0.000267                 | 121                         | 226                       | 1.87                     | 0.999968                 |
| Solyc03g005320.2      | Fatty acid elongase 3-ketoacyl-CoA synthase | 60                    | 379                       | 6.36                     | 1.64E-06                 | 120                         | 127                       | 1.06                     | 0.999968                 |
| Solyc01g110630.2      | Auxin-induced SAUR-like                     | 18                    | 108                       | 5.95                     | 0.000945                 | 36                          | 39                        | 1.08                     | 0.999968                 |
| Solyc04g017720.2      | Gibberellin regulated protein               | 55                    | 312                       | 5.71                     | 1.22E-07                 | 220                         | 232                       | 1.06                     | 0.999968                 |
| Solyc12g056250.1      | Glutathione S-transferase                   | 341                   | 1917                      | 5.62                     | 2.76E-06                 | 603                         | 1304                      | 2.16                     | 0.999968                 |
| Solyc07g062710.2      | BZIP transcription factor                   | 64                    | 342                       | 5.38                     | 6.02E-08                 | 214                         | 210                       | -1.02                    | 0.999968                 |
| Solyc04g081790.2      | GDSL esterase/lipase                        | 54                    | 290                       | 5.38                     | 6.02E-08                 | 262                         | 410                       | 1.57                     | 0.999968                 |
| Solyc04g016190.1      | Glucosyltransferase                         | 87                    | 465                       | 5.33                     | 0.001001                 | 246                         | 326                       | 1.32                     | 0.999968                 |
| Solyc03g097170.2      | Cinnamoyl-CoA reductase-like                | 140                   | 739                       | 5.29                     | 8.31E-07                 | 379                         | 495                       | 1.31                     | 0.999968                 |
| Solyc03g078090.2      | Pectinesterase                              | 19                    | 89                        | 4.80                     | 0.033812                 | 104                         | 144                       | 1.38                     | 0.999968                 |
| Solyc10g005210.2      | DNA-3-methyladenine glycosylase I           | 42                    | 195                       | 4.60                     | 1.64E-06                 | 132                         | 195                       | 1.48                     | 0.999968                 |
| Solyc10g011730.2      | Arabinogalactan                             | 49                    | 219                       | 4.49                     | 3.75E-05                 | 107                         | 171                       | 1.60                     | 0.999968                 |
| Solyc03g006100.2      | Receptor like kinase, RLK                   | 144                   | 633                       | 4.41                     | 0.000322                 | 113                         | 96                        | -1.18                    | 0.999968                 |
| Solyc08g075210.1      | Acyltransferase-like protein                | 60                    | 259                       | 4.31                     | 0.011786                 | 210                         | 127                       | -1.66                    | 0.999968                 |
| Solyc03g114710.2      | Glucosyltransferase                         | 33                    | 141                       | 4.30                     | 0.00217                  | 38                          | 34                        | -1.13                    | 0.999968                 |
| Solyc10g052530.1      | Auxin-responsive protein                    | 20                    | 84                        | 4.29                     | 0.018011                 | 77                          | 67                        | -1.16                    | 0.999968                 |
| Solyc07g064600.2      | Endoribonuclease L-PSP                      | 544                   | 2301                      | 4.23                     | 0.00546                  | 415                         | 2378                      | 5.73                     | 0.000413                 |
| Solyc11g069960.1      | Receptor like kinase, RLK                   | 32                    | 137                       | 4.22                     | 0.000267                 | 124                         | 129                       | 1.04                     | 0.999968                 |
| Solyc04g081870.2      | Expansin                                    | 467                   | 1964                      | 4.20                     | 1.98E-07                 | 2153                        | 1814                      | -1.19                    | 0.999968                 |
| Solyc02g088100.2      | Expansin                                    | 659                   | 2740                      | 4.16                     | 6.02E-08                 | 1878                        | 2823                      | 1.50                     | 0.999968                 |
| Solyc09g083440.2      | Proteinase inhibitor I                      | 297                   | 1232                      | 4.14                     | 0.000293                 | 264                         | 1064                      | 4.03                     | 0.001424                 |
| Solyc07g008560.2      | Purple acid phosphatase                     | 25                    | 103                       | 4.04                     | 0.010653                 | 26                          | 53                        | 2.08                     | 0.999968                 |
| Solyc02g088740.1      | Genomic DNA chromosome 5 TAC clone K3       | 84                    | 332                       | 3.94                     | 1.16E-05                 | 159                         | 183                       | 1.15                     | 0.999968                 |
| Solyc05g005960.2      | Peptide transporter 1                       | 291                   | 1133                      | 3.89                     | 0.000576                 | 741                         | 534                       | -1.39                    | 0.999968                 |
| Solyc04g007690.2      | Auxin efflux carrier                        | 126                   | 486                       | 3.86                     | 6.06E-06                 | 362                         | 377                       | 1.04                     | 0.999968                 |
| Solyc10g074540.1      | Expressed protein                           | 137                   | 521                       | 3.79                     | 5.66E-06                 | 107                         | 254                       | 2.37                     | 0.103198                 |
| Solyc05g006510.1      | Glycosyltransferase                         | 107                   | 396                       | 3.70                     | 1.54E-05                 | 136                         | 261                       | 1.92                     | 0.942727                 |
| Solyc01g105360.2      | UDP-glucuronosyltransferase                 | 207                   | 743                       | 3.60                     | 0.000154                 | 553                         | 349                       | -1.58                    | 0.999968                 |
| Solyc03g123620.2      | Pectinesterase                              | 160                   | 566                       | 3.53                     | 0.006902                 | 379                         | 370                       | -1.02                    | 0.999968                 |
| Solyc02g077110.2      | Lipase-like protein                         | 157                   | 555                       | 3.53                     | 0.000267                 | 279                         | 561                       | 2.01                     | 0.897338                 |
| Solyc07g043000.2      | Unknown Protein                             | 86                    | 305                       | 3.52                     | 0.00921                  | 81                          | 78                        | -1.03                    | 0.999968                 |
| Solyc02g089350.2      | Gibberellin regulated protein               | 1585                  | 5413                      | 3.41                     | 0.003145                 | 6174                        | 5415                      | -1.14                    | 0.999968                 |
| Solyc04g005660.2      | Transcription factor style2.1               | 61                    | 204                       | 3.33                     | 0.00245                  | 98                          | 90                        | -1.09                    | 0.999968                 |
| Solyc02g069490.2      | FAD linked oxidase domain                   | 319                   | 1050                      | 3.29                     | 0.025107                 | 339                         | 352                       | 1.04                     | 0.999968                 |
| Solyc02g087960.2      | MYB transcription factor                    | 108                   | 356                       | 3.28                     | 0.000616                 | 444                         | 332                       | -1.34                    | 0.999968                 |
| Solyc09g091430.2      | Pectate lyase 1-27                          | 1025                  | 3326                      | 3.24                     | 1.22E-07                 | 3198                        | 3375                      | 1.06                     | 0.999968                 |
| Solyc06g060830.2      | Homeobox-leucine zipper                     | 147                   | 477                       | 3.24                     | 0.00921                  | 253                         | 166                       | -1.52                    | 0.999968                 |
| Solyc03g111120.2      | Malate synthase                             | 467                   | 1508                      | 3.23                     | 4.17E-05                 | 336                         | 270                       | -1.24                    | 0.999968                 |
| Solyc03g113250.2      | Nitrate transporter                         | 51                    | 163                       | 3.22                     | 0.045512                 | 167                         | 75                        | -2.24                    | 0.999968                 |
| Solyc01g100660.2      | Transcription factor                        | 137                   | 440                       | 3.21                     | 4.14E-05                 | 273                         | 296                       | 1.08                     | 0.999968                 |
| Solyc09g008670.2      | Threonine ammonia-lyase biosynthetic        | 122                   | 390                       | 3.21                     | 0.013414                 | 45                          | 532                       | 11.89                    | 7.53E-13                 |
| Solyc03g114720.2      | Transcription factor BIM2                   | 156                   | 496                       | 3.18                     | 0.000647                 | 169                         | 157                       | -1.07                    | 0.999968                 |
| Solyc01g090760.2      | GATA transcription factor 9                 | 68                    | 215                       | 3.16                     | 0.02203                  | 44                          | 67                        | 1.52                     | 0.999968                 |
| Solyc09g065560.2      | Sulfate transporter                         | 49                    | 152                       | 3.13                     | 0.012949                 | 83                          | 173                       | 2.07                     | 0.999968                 |

**Supplemental Table 2. Continued**

|                  |                                                              |      |      |      |          |      |      |       |          |
|------------------|--------------------------------------------------------------|------|------|------|----------|------|------|-------|----------|
| Solyc03g110990.1 | Unknown Protein                                              | 39   | 120  | 3.09 | 0.035798 | 194  | 208  | 1.07  | 0.999968 |
| Solyc04g074450.1 | Phi-1 protein                                                | 245  | 746  | 3.05 | 0.000322 | 217  | 440  | 2.02  | 0.494203 |
| Solyc01g079580.2 | DNAJ heat shock protein                                      | 775  | 2342 | 3.02 | 0.000322 | 986  | 1059 | 1.07  | 0.999968 |
| Solyc06g083650.2 | GDSL esterase/lipase                                         | 100  | 302  | 3.02 | 0.006675 | 664  | 661  | -1.01 | 0.999968 |
| Solyc07g041920.2 | Cathepsin L-like cysteine proteinase                         | 232  | 692  | 2.99 | 0.049131 | 28   | 37   | 1.34  | 0.999968 |
| Solyc04g074410.1 | Os06g0220000 protein                                         | 369  | 1076 | 2.92 | 0.000614 | 728  | 1186 | 1.63  | 0.999968 |
| Solyc03g120380.2 | Auxin response factor 9                                      | 56   | 164  | 2.91 | 0.048072 | 97   | 93   | -1.04 | 0.999968 |
| Solyc01g097520.2 | Annexin 11                                                   | 870  | 2501 | 2.88 | 0.005886 | 1727 | 2553 | 1.48  | 0.999968 |
| Solyc03g111690.2 | Pectate lyase                                                | 172  | 493  | 2.87 | 8.98E-05 | 810  | 1085 | 1.34  | 0.999968 |
| Solyc11g072030.1 | Non-specific lipid-transfer                                  | 590  | 1688 | 2.86 | 0.00189  | 1323 | 2097 | 1.58  | 0.999968 |
| Solyc04g080820.2 | Cytokinin oxidase/dehydrogenase                              | 90   | 253  | 2.81 | 0.040156 | 61   | 38   | -1.63 | 0.999968 |
| Solyc08g079740.2 | Receptor like kinase, RLK                                    | 90   | 250  | 2.78 | 0.013414 | 202  | 202  | -1.00 | 0.999968 |
| Solyc07g006300.2 | CER1 protein                                                 | 369  | 1024 | 2.78 | 0.00733  | 1009 | 1012 | 1.00  | 0.999968 |
| Solyc05g005950.2 | Solute carrier family                                        | 687  | 1901 | 2.76 | 0.025107 | 1252 | 1066 | -1.17 | 0.999968 |
| Solyc05g014120.1 | Os08g0119500 protein                                         | 95   | 258  | 2.71 | 0.012855 | 182  | 297  | 1.63  | 0.999968 |
| Solyc07g054470.1 | Unknown Protein                                              | 133  | 358  | 2.70 | 0.008722 | 299  | 379  | 1.27  | 0.999968 |
| Solyc01g073640.2 | oxidoreductase Mb1385                                        | 1526 | 4106 | 2.69 | 0.014012 | 1415 | 1745 | 1.23  | 0.999968 |
| Solyc05g014000.2 | Pectate lyase                                                | 464  | 1230 | 2.65 | 0.00373  | 1851 | 2422 | 1.31  | 0.999968 |
| Solyc01g110680.2 | Auxin-induced SAUR-like protein                              | 72   | 190  | 2.63 | 0.047453 | 80   | 97   | 1.21  | 0.999968 |
| Solyc10g083170.1 | 2,5-dichloro-2,5-cyclohexadiene-1,4-diol dehydrogenase       | 167  | 437  | 2.61 | 0.01348  | 538  | 521  | -1.03 | 0.999968 |
| Solyc05g051240.1 | Aspartic proteinase nepenthesin I                            | 669  | 1728 | 2.58 | 0.02339  | 1077 | 1278 | 1.19  | 0.999968 |
| Solyc03g121270.2 | IAA-amino acid hydrolase                                     | 1347 | 3429 | 2.55 | 0.015785 | 1240 | 4191 | 3.38  | 0.00038  |
| Solyc01g005430.2 | UBX domain protein 6                                         | 83   | 208  | 2.52 | 0.047453 | 128  | 101  | -1.26 | 0.999968 |
| Solyc02g087870.2 | Uncharacterized ABC transporter ATP-binding protein/permease | 213  | 521  | 2.44 | 0.013313 | 328  | 421  | 1.28  | 0.999968 |
| Solyc06g054320.1 | Disease resistance response                                  | 115  | 277  | 2.41 | 0.048072 | 372  | 576  | 1.55  | 0.999968 |
| Solyc03g120790.1 | Unknown Protein                                              | 151  | 363  | 2.40 | 0.012949 | 450  | 452  | 1.01  | 0.999968 |
| Solyc05g051280.2 | Calmodulin-binding heat-shock protein                        | 111  | 266  | 2.40 | 0.035798 | 179  | 225  | 1.25  | 0.999968 |
| Solyc06g007620.2 | POT family domain containing                                 | 464  | 1096 | 2.36 | 0.003969 | 813  | 1035 | 1.27  | 0.999968 |
| Solyc02g082120.2 | DNA-3-methyladenine glycosylase I                            | 725  | 1699 | 2.34 | 0.031042 | 999  | 1024 | 1.02  | 0.999968 |
| Solyc02g089640.2 | Cellulose synthase-like C1-2 glycosyltransferase family 2    | 291  | 679  | 2.34 | 0.018011 | 502  | 540  | 1.08  | 0.999968 |
| Solyc03g111550.2 | GDSL esterase/lipase                                         | 413  | 923  | 2.23 | 0.040156 | 1209 | 1196 | -1.01 | 0.999968 |
| Solyc01g005990.2 | Non-specific lipid-transfer                                  | 878  | 1904 | 2.17 | 0.004863 | 2374 | 2378 | 1.00  | 0.999968 |
| Solyc07g053540.1 | Fasciclin-like arabinogalactan                               | 2563 | 5550 | 2.17 | 0.017273 | 3113 | 4058 | 1.30  | 0.999968 |
| Solyc11g019910.1 | Pectinesterase                                               | 624  | 1294 | 2.07 | 0.018112 | 1131 | 1240 | 1.10  | 0.999968 |
| Solyc06g049050.2 | Expansin                                                     | 2349 | 4834 | 2.06 | 0.041436 | 5728 | 4585 | -1.25 | 0.999968 |

<sup>a</sup> Mean value of two biological replicates.<sup>b</sup> Fold change is the ratio Mean Pac+GA/ Mean Pac<sup>c</sup> Corrected P-values were calculated using the Benjamini–Hochberg (1995) false discovery rate approach

**Supplemental Table 3. Primers used in this study.**

| Clone                          |         | sequence (5'-3')                                                     |
|--------------------------------|---------|----------------------------------------------------------------------|
| <i>GA2ox4</i>                  | qRT-PCR | Forward- CCAACAACACTTCCGGTCTT<br>Reverse- CATTGTCATCACCTGTAATGAG     |
| <i>GA20ox1</i>                 | qRT-PCR | Forward- AGATTGTGTTGGTGGACTTCAA<br>Reverse- TAGCGCCATAAATGTGTCG      |
| <i>GA2ox2</i>                  | qRT-PCR | Forward- ATAGCGACTCCGTTTTTCAGG<br>Reverse- TTTTCATCAGGTGGGACAGA      |
| <i>GA2ox5</i>                  | qRT-PCR | Forward- TTCTCCTCTCCCCTCTCTGA<br>Reverse- TAATCCCTCCGCCAACTTTT       |
| <i>TUB</i>                     | qRT-PCR | Forward- CACATTGGTCAGGCCGGTAT<br>Reverse- CGCGAGATGAGATAAACCA        |
| <i>At-RGA</i>                  | qRT-PCR | Forward- GTAACATGGACGAGGTTGCT<br>Reverse- CGCGAGATGAGATAAACCA        |
| <i>At-GA2ox1</i>               | qRT-PCR | Forward- CACACTTCCTTCTTCTTCAACG<br>Reverse- ATGTCAACGGAGCGATTCTC     |
| <i>At-GA2ox4</i>               | qRT-PCR | Forward- CACTATCCACCAGCACCGTA<br>Reverse- AGGCAGTCACCGACCAATAC       |
| <i>At-GA20ox2</i>              | qRT-PCR | Forward- TATCCTCCATGCCAAACACC<br>Reverse- TCGCGCTCTCTCTATTACA        |
| <i>At-TUB</i>                  | qRT-PCR | Forward- AAACTCACTACCCCCAGCTTT<br>Reverse- GAGAGGAGCAAACCAACCA       |
| <i>ABI3</i>                    | qRT-PCR | Forward- TCCGCAATCACTTCCTATGG<br>Reverse- TGACTTTCTGCTTCTTTCTTTGG    |
| <i>LE25</i>                    | qRT-PCR | Forward- GGAGAAAACCAAAGCCAATG<br>Reverse- CCAGTAGTTCAGTTCCAGTG       |
| <i>FUS3-like</i>               | qRT-PCR | Forward- AGGCGTTCTTCCCTCAACTT<br>Reverse- ATTCGGCTGCTGTTATTTGG       |
| <i>XERICO-like</i>             | qRT-PCR | Forward- TCGTTTGAATGTCGCAGAAG<br>Reverse- GGCCACATGAGAGATGGTTT       |
| <i>GOLS</i>                    | qRT-PCR | Forward- TCTTTCAGCCAAATCCGTCT<br>Reverse- AGCCCCTGGAGAACAGTAGT       |
| <i>Endoribonuclease</i>        | qRT-PCR | Forward- TCTTATTCCTGAGACTGGAGAACT<br>Reverse- GGTAATCCTGCTGCTTGA AAA |
| <i>Threonine ammonia lyase</i> | qRT-PCR | Forward- AACCACCCCACAAATCAAGA<br>Reverse- GCTATCAAACCCCCACCAC        |
